# Supplementary material for: A three-dimensional aromatic B6Li8complex as a high capacity hydrogen storage material
Source: Royal Society of Chemistry journal article supplement (doi:10.1039/c2cc38038b), 2012-12-11
Supplement: c2cc38038b.pdf [file c2cc38038b.pdf]

## **Electronic supplementary information**

### **Three-dimensional aromatic B<sub>6</sub>Li<sub>8</sub> complex as a high capacity hydrogen storage material**

**Truong Ba Tai and Minh Tho Nguyen**

#### **1. Computational methods**

All standard electronic structure calculations are carried out using the Gaussian 03 program.<sup>1</sup> Geometries and harmonic vibrational frequencies of the lower-lying isomers are determined using density functional theory (DFT) with the popular hybrid B3LYP functional which involves the Becke three-parameter exchange<sup>2</sup> and Lee–Yang–Parr correlation<sup>3</sup> functionals. The initial search for all possible low-lying isomers of B<sub>6</sub>Li<sub>8</sub> is performed using a stochastic search algorithm that was implemented by us.<sup>4</sup> Firstly, the possible structures of B<sub>6</sub>Li<sub>8</sub> are generated by random “kick” method, and then rapidly optimized at the B3LYP/3-21G level.<sup>5</sup> In this search procedure, the minimum and maximum distances between atoms are limited to 1.5 and 10 Å, respectively. Geometries of the lower-lying isomers with relative energy of 2.00 eV and their vibrational frequencies are further refined using the B3LYP functional in conjunction with the 6-311+G(d) basis set.<sup>6</sup> In order to obtain more accurate energetic properties, the optimizations and geometries and calculations of vibrational frequencies of few lowest-lying isomers are further performed at the MP2/6-311+G(d) level of theory.

Nucleus independent chemical shift (NICS) of the global minimum B<sub>6</sub>Li<sub>8</sub> (C<sub>i</sub>) and B<sub>6</sub>H<sub>6</sub><sup>2-</sup>(O<sub>h</sub>), Si<sub>6</sub><sup>2-</sup>(O<sub>h</sub>) is calculated at center positions of the B<sub>6</sub> and Si<sub>6</sub> cages by using GIAO-B3LYP/6-311+G(d) method.<sup>7</sup> Natural charge populations and Wiberg bond indices of compounds are computed at the B3LYP/6-311+G(d) level of theory by using NBO software.<sup>8</sup> Electron localization function (ELF) of the B<sub>6</sub>Li<sub>8</sub> is obtained at the B3LYP/6-311+G(d) wavefunction using Dgrid-4.5 software.<sup>9</sup> Total (DOS) and partial (pDOS) densities of states of B<sub>6</sub>Li<sub>8</sub> are obtained at the wB97XD/6-31++G(2d,2p) level.

2. Plots of average adsorption energies ( $E_{\text{ads}}$ , eV) per  $\text{H}_2$  molecule of  $\text{B}_6\text{Li}_8-n\text{H}_2$  and reaction enthalpy ( $\Delta H$ , eV) of processes:  $\text{B}_6\text{Li}_8-n\text{H}_2 \rightarrow \text{B}_6\text{Li}_8 + n\text{H}_2$ . All values are calculated at wB97XD/6-31++G(2d,2p) level.

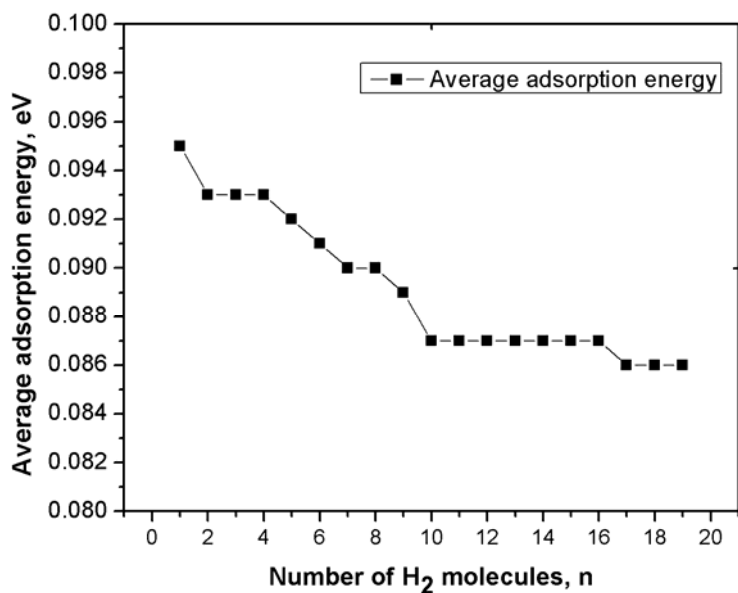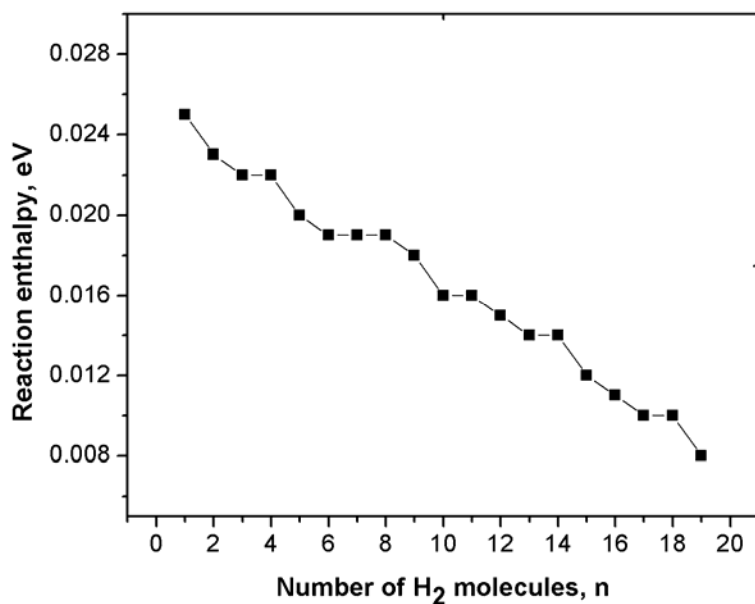

3. Cartesian coordinates of the low-lying isomers  $B_6Li_8$  obtained at the B3LYP/6-311+G(d) level and configurations I, II and III obtained at the wB97XD/6-31++G(2d,2p) levels.

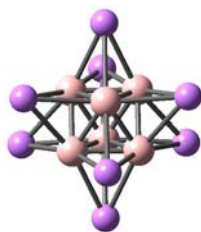

$C_i, {}^1A_g$

|   |              |              |              |
|---|--------------|--------------|--------------|
| 5 | 0.960767000  | 0.621260000  | -0.481108000 |
| 5 | -0.487552000 | 1.066989000  | 0.405472000  |
| 5 | 0.487537000  | -1.067625000 | -0.405234000 |
| 5 | -0.960924000 | -0.621611000 | 0.480795000  |
| 5 | 0.616391000  | -0.125167000 | 1.070172000  |
| 5 | -0.616155000 | 0.124906000  | -1.070386000 |
| 3 | 1.352810000  | 1.939019000  | 1.230547000  |
| 3 | -0.178651000 | 2.248790000  | -1.419753000 |
| 3 | 0.178492000  | -2.248579000 | 1.420732000  |
| 3 | -1.031088000 | 0.398633000  | 2.425562000  |
| 3 | -2.559559000 | 0.708107000  | -0.227491000 |
| 3 | 2.560336000  | -0.705935000 | 0.227381000  |
| 3 | 1.031833000  | -0.399948000 | -2.425190000 |
| 3 | -1.354278000 | -1.938005000 | -1.231305000 |

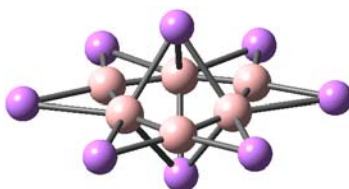

$D_{3d}, {}^1A_{1g}$

|   |              |              |              |
|---|--------------|--------------|--------------|
| 5 | 0.000000000  | 1.337484000  | 0.000001000  |
| 5 | 0.000000000  | -1.800062000 | 0.000004000  |
| 5 | 1.558899000  | 0.900031000  | 0.000004000  |
| 5 | 1.158295000  | -0.668742000 | 0.000001000  |
| 5 | -1.158295000 | -0.668742000 | 0.000001000  |
| 5 | -1.558899000 | 0.900031000  | 0.000004000  |
| 3 | -1.664634000 | -2.909149000 | -0.000004000 |
| 3 | -3.351714000 | 0.012959000  | -0.000004000 |
| 3 | -1.687079000 | 2.896190000  | -0.000004000 |
| 3 | 1.687079000  | 2.896190000  | -0.000004000 |
| 3 | 3.351714000  | 0.012959000  | -0.000004000 |
| 3 | 1.664634000  | -2.909149000 | -0.000004000 |
| 3 | 0.000000000  | 0.000000000  | -1.731937000 |
| 3 | 0.000000000  | 0.000000000  | 1.731939000  |

|   |              |              |              |
|---|--------------|--------------|--------------|
| 5 | -0.260844000 | -0.129449000 | 1.194373000  |
| 5 | 1.204610000  | -0.339910000 | 0.264856000  |
| 5 | -1.119322000 | 0.311394000  | -0.263329000 |
| 5 | 0.346941000  | 0.098746000  | -1.193203000 |
| 5 | 0.332752000  | 1.170924000  | 0.187286000  |
| 5 | -0.247423000 | -1.200838000 | -0.185765000 |
| 3 | 1.477406000  | 0.923811000  | 2.049305000  |
| 3 | 0.755085000  | -2.045576000 | 1.586299000  |
| 3 | -0.668337000 | 2.010828000  | -1.591209000 |
| 3 | 2.235931000  | 1.214466000  | -0.911726000 |
| 3 | 1.523672000  | -1.753961000 | -1.385575000 |
| 3 | -1.430774000 | 1.717958000  | 1.400980000  |
| 3 | -2.147353000 | -1.248901000 | 0.910339000  |
| 3 | -1.384769000 | -0.944940000 | -2.056192000 |
| 1 | 1.280872000  | -3.740401000 | 3.008052000  |
| 1 | 0.859247000  | -3.303429000 | 3.446268000  |
| 1 | -1.318177000 | 3.902795000  | -2.673055000 |
| 1 | -1.972907000 | 3.554639000  | -2.557435000 |
| 1 | -2.755185000 | 3.305349000  | 2.358363000  |
| 1 | -3.184109000 | 3.048860000  | 1.797020000  |
| 1 | 2.620740000  | 1.778959000  | 3.809660000  |
| 1 | 2.470904000  | 2.403031000  | 3.427018000  |
| 1 | 2.964856000  | -3.234490000 | -2.299540000 |
| 1 | 2.425846000  | -3.235318000 | -2.813118000 |
| 1 | -2.610206000 | -2.040283000 | -3.620646000 |
| 1 | -3.108061000 | -1.530618000 | -3.387696000 |
| 1 | 3.934307000  | 2.502085000  | -1.692179000 |
| 1 | 4.077285000  | 1.860066000  | -2.052865000 |
| 1 | -3.858235000 | -2.553822000 | 1.558737000  |
| 1 | -4.193320000 | -1.892807000 | 1.663665000  |

### Configuration I

|   |              |              |              |
|---|--------------|--------------|--------------|
| 5 | 0.936599000  | 0.637868000  | -0.532762000 |
| 5 | -0.475681000 | 1.027025000  | 0.440754000  |
| 5 | 0.504960000  | -1.065379000 | -0.472646000 |
| 5 | -0.907469000 | -0.676036000 | 0.500643000  |
| 5 | 0.684140000  | -0.154618000 | 1.009205000  |
| 5 | -0.654629000 | 0.116140000  | -1.040876000 |
| 3 | 1.409283000  | 1.893319000  | 1.245758000  |
| 3 | -0.295147000 | 2.277919000  | -1.363610000 |
| 3 | 0.320859000  | -2.315230000 | 1.333930000  |
| 3 | -0.897448000 | 0.269250000  | 2.490203000  |
| 3 | -2.579818000 | 0.655322000  | -0.115736000 |
| 3 | 2.608656000  | -0.697443000 | 0.073686000  |
| 3 | 0.925291000  | -0.303368000 | -2.523679000 |
| 3 | -1.377959000 | -1.933552000 | -1.277891000 |
| 1 | 1.351951000  | 3.495076000  | 2.915267000  |
| 1 | 0.449745000  | 3.551646000  | -3.160241000 |
| 1 | -4.006519000 | 2.314117000  | -0.786168000 |
| 1 | -1.032446000 | 1.753586000  | 4.273690000  |
| 1 | -1.318201000 | -3.528973000 | -2.954416000 |
| 1 | -0.429238000 | -3.582392000 | 3.134167000  |
| 1 | 4.016618000  | -2.281773000 | 0.998955000  |
| 1 | 1.065437000  | -1.785416000 | -4.307118000 |
| 1 | -1.213821000 | 2.108294000  | 3.639002000  |
| 1 | 3.442897000  | 2.977149000  | 1.443349000  |
| 1 | 1.017438000  | 3.174255000  | -2.846839000 |
| 1 | 3.653464000  | -1.931010000 | 1.553058000  |
| 1 | 1.246896000  | -2.140408000 | -3.672626000 |
| 1 | -3.404833000 | -3.028493000 | -1.474383000 |
| 1 | -0.995153000 | -3.204149000 | 2.818875000  |
| 1 | -3.760037000 | 2.012001000  | -1.425241000 |
| 1 | 4.752709000  | 0.184486000  | 0.304725000  |
| 1 | 0.704974000  | 3.504180000  | 2.536264000  |
| 1 | -1.724917000 | 4.041869000  | -1.831793000 |
| 1 | -4.715195000 | -0.244164000 | -0.349428000 |
| 1 | -1.054508000 | -0.845559000 | 4.523154000  |
| 1 | 1.737617000  | -4.085591000 | 1.818830000  |
| 1 | -0.671140000 | -3.538509000 | -2.575573000 |
| 1 | 1.058752000  | 0.815315000  | -4.553569000 |
| 1 | 0.356388000  | 0.864020000  | -4.295950000 |
| 1 | 4.360585000  | 0.595218000  | -0.184347000 |
| 1 | 1.713602000  | -3.985767000 | 1.076377000  |
| 1 | -3.262989000 | -2.898727000 | -0.749748000 |
| 1 | -0.350622000 | -0.898262000 | 4.270973000  |
| 1 | -4.322363000 | -0.650675000 | 0.142824000  |
| 1 | -1.694291000 | 3.938613000  | -1.089937000 |
| 1 | 3.300944000  | 2.847235000  | 0.718715000  |

## Configuration II

|   |              |              |              |
|---|--------------|--------------|--------------|
| 5 | -0.988068000 | -0.142479000 | 0.785563000  |
| 5 | -0.889290000 | -0.018228000 | -0.960690000 |
| 5 | 0.775307000  | -0.133774000 | 0.883854000  |
| 5 | 0.871630000  | -0.009836000 | -0.864159000 |
| 5 | -0.040966000 | -1.308827000 | -0.127804000 |
| 5 | -0.077440000 | 1.161283000  | 0.048961000  |
| 3 | -2.140934000 | -1.737698000 | -0.263362000 |
| 3 | -2.296819000 | 1.400170000  | -0.076506000 |
| 3 | 2.172771000  | -1.569354000 | -0.000723000 |
| 3 | 0.116220000  | -1.458905000 | -2.316197000 |
| 3 | -0.004235000 | 1.589886000  | -2.119318000 |
| 3 | -0.112187000 | -1.750958000 | 2.039799000  |
| 3 | -0.229649000 | 1.313356000  | 2.233833000  |
| 3 | 2.046619000  | 1.584981000  | 0.121382000  |
| 1 | -3.842104000 | -2.255107000 | -1.696757000 |
| 1 | -3.544893000 | 2.693215000  | 1.430648000  |
| 1 | -0.989311000 | 3.493106000  | -2.953294000 |
| 1 | -1.276596000 | -2.476313000 | -3.899277000 |
| 1 | 3.490757000  | 2.273114000  | 1.801056000  |
| 1 | 3.657846000  | -2.626394000 | -1.439919000 |
| 1 | 0.673879000  | -3.739008000 | 2.911636000  |
| 1 | 1.042396000  | 2.055770000  | 4.052103000  |
| 1 | -1.579324000 | -1.852687000 | -3.608609000 |
| 1 | -3.782194000 | -2.667169000 | 1.061721000  |
| 1 | -3.249628000 | 2.084646000  | 1.758140000  |
| 1 | 0.535949000  | -3.837564000 | 2.180820000  |
| 1 | 1.335030000  | 1.442207000  | 3.731272000  |
| 1 | 4.174270000  | 1.820537000  | -0.973205000 |
| 1 | 3.350647000  | -2.015128000 | -1.752377000 |
| 1 | -0.866549000 | 3.584661000  | -2.217827000 |
| 1 | -1.571334000 | -2.657355000 | 3.643353000  |
| 1 | -3.492526000 | -1.617160000 | -1.893467000 |
| 1 | -3.593658000 | 2.870010000  | -1.272908000 |
| 1 | 1.653361000  | 3.022200000  | -3.012313000 |
| 1 | 1.345405000  | -3.067259000 | -3.404895000 |
| 1 | 3.188807000  | -3.254559000 | 1.206714000  |
| 1 | 3.130810000  | 1.631424000  | 1.965158000  |
| 1 | -1.141889000 | 3.190371000  | 3.264657000  |
| 1 | -0.988647000 | 3.329049000  | 2.542618000  |
| 1 | -1.838946000 | -2.029966000 | 3.326490000  |
| 1 | 2.969065000  | -2.723892000 | 1.688715000  |
| 1 | 3.704086000  | 1.312306000  | -1.271083000 |
| 1 | 1.069445000  | -3.380247000 | -2.781535000 |
| 1 | 1.919093000  | 2.335214000  | -2.862252000 |
| 1 | -3.348954000 | 2.338051000  | -1.742025000 |
| 1 | -3.463736000 | -2.060848000 | 1.376334000  |
| 1 | 4.435926000  | -0.748701000 | 0.409833000  |
| 1 | 3.909135000  | -0.516296000 | 0.893343000  |
| 1 | -4.093641000 | 0.151953000  | 0.410867000  |
| 1 | -4.590209000 | 0.415411000  | -0.088889000 |
| 1 | 2.009236000  | 3.766473000  | -0.183625000 |
| 1 | 2.747771000  | 3.860804000  | -0.286560000 |

### Configuration III

- 
1. M. J. Frisch et al, Gaussian 03, Revision C.01. *Gaussian, Inc., Wallingford CT*, 2004
  2. A. D. Becke, *J. Chem. Phys.*, 1993, **98**, 5648.
  3. C. Lee, W. Yang and R. G. Parr, *Phys. Rev. B*, 1988, **37**, 785.
  4. T. B Tai and M. T. Nguyen, *J. Chem. Theor. Comput*, 2011, **7**, 1119.
  5. W. J. Stevens, M. Krauss, H. Basch and P. R. Jasien, *Can. J. Chem*, 1992, **70**, 612.
  6. (a) P. C. Harihara and J. A. Pople, *Theoret. Chimica Acta.*, 1973, **28**, 213; (b) M. M. Francl, W. J. Pietro, W. J. Hehre, J. S. Binkley, M. S. Gordon, D. J. DeFrees and J. A. Pople, *J. Chem. Phys.*, 1982, **77**, 3654.
  7. P. v. R. Schleyer, C. Maerker, A. Dransfeld, H. Jiao and N. J. R. v. E. Hommes, *J. Am. Chem. Soc.*, 1996, **118**, 6317.
  8. E. D. Glendening, J. K. Badenhoop, A. E. Reed, J. E. Carpenter, J. A. Bohmann, C. M. Morales and F. Weinhold, *NBO 5.0*. Theoretical Chemistry Institute, University of Wisconsin, Madison, 2001.
  9. M. Kohout, DGrid 4.6; Max Planck Institute for Physical Chemistry of Solids: Dresden, Germany, 2011.
